# Supplementary material
Source: Springer Nature journal article supplement (https://www.springermedizin.de/resource/supplementary/12913_2006_493_MOESM4_ESM.pdf/9534868)
Supplement: MOESM4 [file 9534868]

| Condition                                       | Pneumonia                                         | Diarrhoea             | HIV/AIDS                                      | HIV/AIDS                                | HIV transmission from mother to child       | Tuberculosis + HIV           | Tuberculosis                             | Malaria                                    | Malaria              |
|-------------------------------------------------|---------------------------------------------------|-----------------------|-----------------------------------------------|-----------------------------------------|---------------------------------------------|------------------------------|------------------------------------------|--------------------------------------------|----------------------|
| <b>Intervention</b>                             | Integrated management of childhood illness (IMCI) | Safe water (software) | Highly active anti-retroviral therapy (HAART) | Voluntary Counselling and Testing (VCT) | Single dose Nevirapine (targeted treatment) | Community based DOTs         | Community based DOTs                     | Intermittent treatment of pregnant mothers | Impregnated bed nets |
| <b>Total costs per life year saved (USD)</b>    | 3                                                 |                       | 1800                                          |                                         |                                             |                              |                                          |                                            |                      |
| <b>Total cost per DALY saved (USD)</b>          | ---                                               | 27                    | ---                                           | 18                                      | 11                                          | 14-21                        | 14-21                                    | 4-29                                       | 19-85                |
| <b>Quality of evidence: (Poor/average/good)</b> | Poor                                              | Average               | Average                                       | Average                                 | Good                                        | Average                      | Average                                  | Average                                    | Good                 |
| <b>Data sources</b>                             | Jha 1998                                          | Varley, 1998          | Creese, 2002<br>Harries, 2001                 | Creese, 2002<br>Sweat, 2000             | Creese, 2002<br>Marseille, 1999             | Creese, 2002,<br>Floyd, 1997 | Creese, 2002,<br>Floyd, 1997<br>Jha 1998 | Goodman, 1999; 2000                        | Goodman, 1999; 2000  |

\* The search for evidence was restricted to the period 1995-2002. Especially for HART, new evidence on cost-effectiveness has been published, and this evidence might potentially have changed the ranking of interventions.
